# Supplementary material for: Preintervention risk stratification of renal pelvic cancer and ureteral cancer should differ
Source: PubMed Central journal article supplement — Investig Clin Urol. 2020 May 27;61(4):397–404. doi: 10.4111/icu.2020.61.4.397 (PMC7329638; doi:10.4111/icu.2020.61.4.397), 2020-05-27
Supplement: icu-61-397-s001.pdf [file icu-61-397-s001.pdf]

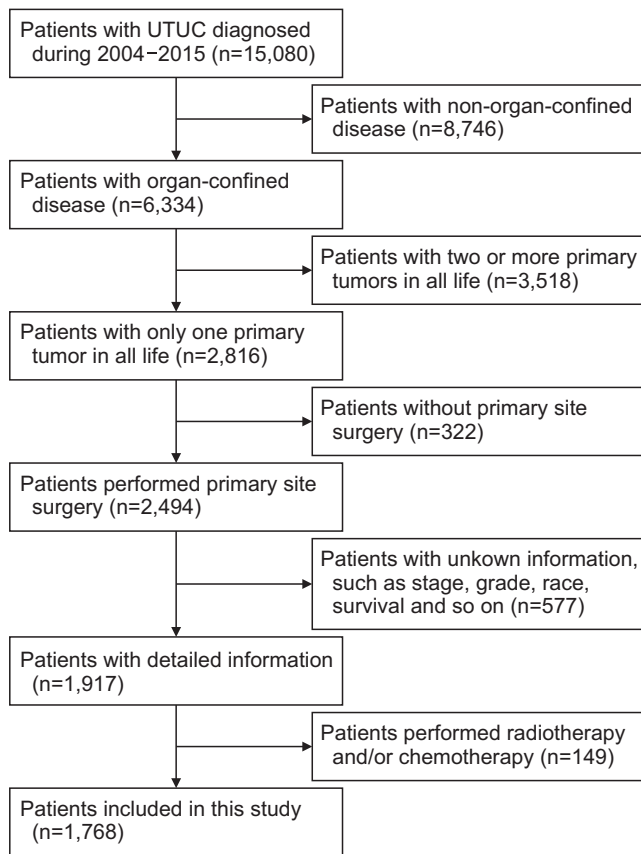

**Supplementary Fig. 1.** Flow chart of patients' cohort definition. UTUC, upper urinary tract urothelial carcinoma.
